# Supplementary material for: µ-Theraphotoxin Pn3a inhibition of CaV3.3 channels reveals a novel isoform-selective drug binding site
Source: eLife. 2022 Jul 20;11:e74040. doi: 10.7554/eLife.74040 (PMC9342953; doi:10.7554/eLife.74040)
Supplement: Figure 1—source data 1. [file elife-74040-fig1-data1.xlsx]

## Sheet: Sheet1
Pn3a inhibition of T-type calcium channels
% Inhibition by 10 µM Pn3a					Icontrol/IPn3a					Kinetics of Pn3a inhibition of Cav3.3
Channel	MEAN	SEM	N		[Pn3a]	MEAN	SEM	N		[Pn3a]	MEAN	SEM	N
					(µM)					(µM)
Cav3.1	3.8	1.8	5		30	0.05	0.01225	5		10	0.41576	0.02334	5
Cav3.2	2.5	2.5	5		10	0.098	0.01934	5		3	0.16264	0.00904	5
Cav3.3	90.2	1.93391	5		3	0.264	0.01568	5		1	0.088	0.00411	5
					1	0.522	0.0153	5
					0.3	0.71	0.00548	5
					0.1	0.89	0.00796	5
