# Supplementary material for: µ-Theraphotoxin Pn3a inhibition of CaV3.3 channels reveals a novel isoform-selective drug binding site
Source: eLife. 2022 Jul 20;11:e74040. doi: 10.7554/eLife.74040 (PMC9342953; doi:10.7554/eLife.74040)
Supplement: Figure 2—source data 1. [file elife-74040-fig2-data1.xlsx]

## Sheet: Sheet1
Pn3a votlage effects o activation, steady-state inactivation, and recovery from inactivation
Cav3.3 Activation									Cav3.3 Steady-state inactivation									Cav3.3 Recovery from Inactivation
Control				Pn3a					Control				Pn3a					Control				Pn3a
Voltage	MEAN	SEM	N	Voltage	MEAN	SEM	N		Voltage	MEAN	SEM	N	Voltage	MEAN	SEM	N		Time	MEAN	SEM	N	Time	MEAN	SEM	N
(mV)				(mV)					(mV)				(mV)					(s)				(s)
-90	0	0	5	-90	0	0	5		-90	1	0	5	-90	1	0	5		0	0.000763958	0.0103	5	0	0.0271	0.05741	5
-80	0.00335	0.00274	5	-80	0.00862	0.00592	5		-85	0.97544	0.00792	5	-85	0.92765	0.05522	5		0.01	0.00976	0.00872	5	0.01	0.0294	0.06091	5
-70	0.00744	0.00409	5	-70	0.01043	0.00809	5		-80	0.9469	0.01772	5	-80	0.93922	0.02895	5		0.03	0.05195	0.00541	5	0.03	0.09292	0.06495	5
-60	0.00294	0.00108	5	-60	0.01151	0.01508	5		-75	0.9008	0.02593	5	-75	0.89219	0.03061	5		0.05	0.10618	0.00116	5	0.05	0.17448	0.04363	5
-50	0.0354	0.01272	5	-50	0.00439	0.00954	5		-70	0.84116	0.03431	5	-70	0.80664	0.04143	5		0.1	0.22891	0.01069	5	0.1	0.33165	0.03364	5
-40	0.16471	0.0628	5	-40	0.05357	0.02043	5		-65	0.7627	0.05975	5	-65	0.71891	0.05475	5		0.2	0.43625	0.0268	5	0.2	0.59734	0.01722	5
-30	0.46149	0.08226	5	-30	0.1868	0.02439	5		-60	0.62808	0.08813	5	-60	0.61773	0.05555	5		0.3	0.58733	0.03664	5	0.3	0.762	0.03763	5
-20	0.7446	0.06162	5	-20	0.41149	0.0283	5		-55	0.46769	0.09815	5	-55	0.45935	0.06241	5		0.5	0.78241	0.03984	5	0.5	0.92198	0.01158	5
-10	0.90597	0.02811	5	-10	0.61538	0.04933	5		-50	0.3155	0.10565	5	-50	0.33858	0.05662	5		1	0.94566	0.02693	5	1	1	0.00911	5
0	0.98986	0.00459	5	0	0.81687	0.04418	5		-45	0.18679	0.09605	5	-45	0.20014	0.04866	5		1.5	0.99017	0.02043	5	1.5	1	0.01026	5
10	0.96625	0.0195	5	10	0.91404	0.02513	5		-40	0.08436	0.05828	5	-40	0.12904	0.02497	5		2	1	0.01534	5	2	1	0.0069	5
20	0.9696	0.0218	5	20	0.98817	0.02436	5		-35	0.02914	0.02836	5	-35	0.02836	0.00661	5		3	1	0.01673	5	3	1	0.0021	5
30	0.97518	0.02224	5	30	0.99309	0.02888	5		-30	0.00268	0.00886	5	-30	-0.00806	0.00852	5		5	1	0.00528	5	5	1	0.000358443	5
40	1	0	5	40	1	0	5		-25	-0.0029	0.00246	5	-25	0.00881	0.01554	5		10	1	0.01008	5	10	1	0.00122	5
									-20	0	0	5	-20	0	0	5
