# Supplementary material for: µ-Theraphotoxin Pn3a inhibition of CaV3.3 channels reveals a novel isoform-selective drug binding site
Source: eLife. 2022 Jul 20;11:e74040. doi: 10.7554/eLife.74040 (PMC9342953; doi:10.7554/eLife.74040)
Supplement: Figure 3—source data 1. [file elife-74040-fig3-data1.xlsx]

## Sheet: Sheet1
Voltage dependence of Pn3a inhibition
% Inhibition of ICa by 3 µM Pn3a					% Inhibition of INa by 3 µM Pn3a					tau deactivation
										Control				Pn3a
Voltage	MEAN	SEM	N		Voltage	MEAN	SEM	N		Voltage	MEAN	SEM	N	Voltage	MEAN	SEM	N
(mV)					(mV)					(mV)				(mV)
-30	0.75311	0.04537	5		-40	0.95234	0.01878	5		-90	0.79789	0.05026	5	-90	0.7245	0.02702	5
-20	0.6883	0.01992	5		-30	0.96529	0.00719	5		-80	0.99208	0.07791	5	-80	0.80459	0.03839	5
-10	0.62574	0.01272	5		-20	0.96744	0.00856	5		-70	1.32685	0.14225	5	-70	0.91934	0.03038	5
0	0.58764	0.01048	5		-10	0.96059	0.0091	5		-60	2.05931	0.30505	5	-60	1.16994	0.02835	5
10	0.5265	0.02237	5		0	0.93919	0.01004	5		-50	4.45062	0.84178	5	-50	1.76002	0.06768	5
					10	0.89046	0.03822	5		-40	10.8013	1.05659	5	-40	3.95495	0.29663	5
					30	0.70359	0.02115	5		-30	17.3095	0.74414	5	-30	11.5214	1.06905	5
					40	0.62167	0.0312	5		-20	20.1862	0.77423	5	-20	17.2987	0.83339	5
					50	0.55985	0.03385	5
					60	0.48573	0.03547	5
