# Supplementary material for: µ-Theraphotoxin Pn3a inhibition of CaV3.3 channels reveals a novel isoform-selective drug binding site
Source: eLife. 2022 Jul 20;11:e74040. doi: 10.7554/eLife.74040 (PMC9342953; doi:10.7554/eLife.74040)
Supplement: Figure 5—source data 1. [file elife-74040-fig5-data1.xlsx]

## Sheet: Sheet1
Voltage dependence of Pn3a inhibition of Kv1.7/Cav3.3 Chimera
Activation
Kv1.7				Pn3a					KV1.7/CaV3.3DI				Pn3a					KV1.7/CaV3.3DII				Pn3a					KV1.7/CaV3.3DIII				Pn3a					KV1.7/CaV3.3DIV				Pn3a
Voltage	MEAN	SEM	N	Voltage	MEAN	SEM	N		Voltage	MEAN	SEM	N	Voltage	MEAN	SEM	N		Voltage	MEAN	SEM	N	Voltage	MEAN	SEM	N		Voltage	MEAN	SEM	N	Voltage	MEAN	SEM	N		Voltage	MEAN	SEM	N	Voltage	MEAN	SEM	N
(mV)				(mV)					(mV)				(mV)					(mV)				(mV)					(mV)				(mV)					(mV)				(mV)
-60	0	0	7	-60	0	0	7		0	0	0	5	0	0	0	5		0	0	0	9	0	0	0	7		0	0	0	7	0	0	0	5		-120	0	0	5	-120	0	0	5
-50	0.000190439	0.00043695	7	-50	-0.00114	0.00091929	7		10	-0.000867317	0.00357	5	10	-0.01115	0.0118	5		10	-0.00773	0.00664	9	10	0.00962	0.01209	7		10	0.02423	0.00632	7	10	0.02494	0.00796	5		-110	0.01299	0.01493	5	-110	0.0025	0.0034	5
-40	0.00714	0.00279	7	-40	0.00216	0.00306	7		20	-0.00912	0.00664	5	20	-0.00884	0.01077	5		20	-0.00495	0.0105	9	20	0.01714	0.02754	7		20	0.06327	0.01268	7	20	0.08087	0.03063	5		-100	-0.00634	0.00417	5	-100	0.00679	0.00373	5
-30	0.07671	0.02641	7	-30	0.06194	0.02253	7		30	-0.00645	0.00652	5	30	0.00269	0.00508	5		30	-0.00411	0.01351	9	30	0.01905	0.04017	7		30	0.12072	0.01832	7	30	0.12759	0.03084	5		-90	-0.00457	0.0105	5	-90	0.01905	0.00646	5
-20	0.29685	0.04868	7	-20	0.28033	0.03354	7		40	-0.00715	0.01136	5	40	-0.00178	0.01078	5		40	0.00276	0.01195	9	40	0.01735	0.04516	7		40	0.19557	0.02376	7	40	0.1898	0.03194	5		-80	0.07292	0.026	5	-80	0.11257	0.05173	5
-10	0.55196	0.04427	7	-10	0.5319	0.03216	7		50	0.01132	0.01502	5	50	0.03197	0.0138	5		50	0.02024	0.01142	9	50	0.01675	0.05285	7		50	0.28849	0.0294	7	50	0.26085	0.03746	5		-70	0.31973	0.07598	5	-70	0.31642	0.09032	5
0	0.73225	0.03942	7	0	0.71732	0.03463	7		60	0.05027	0.03543	5	60	0.0917	0.02305	5		60	0.05993	0.0121	9	60	0.00977	0.05685	7		60	0.38648	0.03354	7	60	0.35304	0.04819	5		-60	0.56506	0.08994	5	-60	0.50757	0.08088	5
10	0.84978	0.03699	7	10	0.83752	0.03868	7		70	0.13244	0.05707	5	70	0.17178	0.03965	5		70	0.13558	0.02431	9	70	0.02012	0.06655	7		70	0.49345	0.04016	7	70	0.44946	0.0541	5		-50	0.73248	0.07967	5	-50	0.75558	0.08648	5
20	0.92875	0.03206	7	20	0.91911	0.03784	7		80	0.28702	0.08658	5	80	0.33039	0.05046	5		80	0.23352	0.03871	9	80	0.07696	0.07786	7		80	0.59963	0.04506	7	80	0.54327	0.0567	5		-40	0.84253	0.07786	5	-40	0.89397	0.0962	5
30	0.97176	0.02726	7	30	0.96763	0.03127	7		90	0.46395	0.11313	5	90	0.55305	0.06678	5		90	0.38144	0.06099	9	90	0.14172	0.08378	7		90	0.69991	0.04676	7	90	0.64521	0.05407	5		-30	0.91288	0.04944	5	-30	0.91766	0.07007	5
40	0.99045	0.02169	7	40	0.99147	0.02509	7		100	0.66334	0.10068	5	100	0.71053	0.06624	5		100	0.54693	0.07726	9	100	0.28053	0.08225	7		100	0.76839	0.04115	7	100	0.73852	0.04876	5		-20	0.98529	0.04226	5	-20	0.97436	0.06825	5
50	0.997	0.01714	7	50	0.99802	0.01849	7		110	0.85067	0.08581	5	110	0.87173	0.06029	5		110	0.69	0.07011	9	110	0.43803	0.09419	7		110	0.83687	0.03054	7	110	0.8192	0.04169	5		-10	0.99513	0.04057	5	-10	0.98124	0.0635	5
60	0.99947	0.01	7	60	0.99673	0.01501	7		120	0.9515	0.05819	5	120	0.94191	0.04812	5		120	0.82432	0.06337	9	120	0.63455	0.07972	7		120	0.90446	0.01925	7	120	0.89531	0.03018	5		0	0.98381	0.01391	5	0	0.98326	0.04108	5
70	0.99157	0.00859	7	70	0.9882	0.01282	7		130	0.97743	0.02728	5	130	0.96578	0.03621	5		130	0.92635	0.05065	9	130	0.80294	0.07563	7		130	0.95475	0.00765	7	130	0.95411	0.01988	5		10	0.98178	0.00805	5	10	1.00259	0.03593	5
80	0.98977	0.00998	7	80	0.98031	0.01096	7		140	1.00652	0.01512	5	140	0.98922	0.01584	5		140	0.97661	0.0327	9	140	0.90386	0.03266	7		140	0.99476	0.00782	7	140	1.00284	0.00893	5		20	1.01635	0.01901	5	20	1.01247	0.01974	5
90	1	0	7	90	1	0	7		150	1.00811	0.01457	5	150	0.99646	0.02543	5		150	0.98134	0.01367	9	150	0.96386	0.02421	7		150	1.00589	0.00453	7	150	0.99923	0.00291	5		30	1	0	5	30	1	0	5
									160	1	0	5	160	1	0	5		160	1	0	9	160	1	0	7		160	1	0	7	160	1	0	5
